# Supplementary material for: Simulator Fidelity Does Not Affect Training for Robot-Assisted Minimally Invasive Surgery
Source: MDPI journal article supplement (doi:10.3390/jcm12072557), 2023-03-28
Supplement: s1 [file s1]

**Supplementary Table S1**

**Self-Assessment #1. Robotic Surgery Training Study (Before)**

Student                      Resident                      Faculty

Number: \_\_\_\_\_

M / F

Age: \_\_\_\_\_

Year graduate medical school : \_\_\_\_\_

Years of Residency completed : \_\_\_\_\_

Number of open operations: \_\_\_\_\_

Number of Laparoscopic Operations: \_\_\_\_\_

Number of Robotic Operations: \_\_\_\_\_

Hours per week of video games (average for last 5 years): \_\_\_\_\_

(Before Page 2)

Surgical ability self-assessment:

1-----2-----3-----4-----5-----6-----7  
Low Average High

Confidence to perform Laparoscopic Surgery

1-----2-----3-----4-----5-----6-----7  
Low Average High

Confidence to perform Robotic surgery

1-----2-----3-----4-----5-----6-----7  
Low Average High

### Supplementary Table S2

## Self-Assessment #2. Robotic Surgery Training Study (After Training on simulator)

Number: \_\_\_\_\_

Trainer used : Dry Box    Lap Sim    Mimic VR    DaVinci

Number of Hours on Trainer: \_\_\_\_\_

### Confidence with laparoscopic surgery

1-----2-----3-----4-----5-----6-----7

Low Average High

### Confidence with using the DaVinci after the simulation

1-----2-----3-----4-----5-----6-----7

Low Average High

If you did not train with the DaVinci itself:

“Training with the DaVinci would have been better than the training I used”

1-----2-----3-----4-----5-----6-----7

Disagree                      No opinion                      Strongly Agree

### Self- Assessment of Training Performance

1-----2-----3-----4-----5-----6-----7

Low Average High

**Supplementary Table S3**

**Self-Assessment #3. Robotic Surgery Training Study (After DaVinci Assessment)**

Number: \_\_\_\_\_

Trainer used : Dry Box    Lap Sim    Mimic VR    DaVinci

If you did not train with the DaVinci:

“Training with the DaVinci would have been better than the training I used”

1-----2-----3-----4-----5-----6-----7

Disagree

No opinion

Strongly Agree

I was satisfied with the simulation training I received before using the DaVinci

1-----2-----3-----4-----5-----6-----7

Disagree

No opinion

Strongly Agree

Self-Assessment of DaVinci Performance

1-----2-----3-----4-----5-----6-----7

Low

Average

High

Confidence with using the DaVinci

1-----2-----3-----4-----5-----6-----7

Low

Average

High
